1 Proof of concept: Malaria rapid diagnostic tests and massively parallel  
2 sequencing for surveillance of molecular markers of antimalarial resistance  
3 in Bissau, Guinea-Bissau during 2014-2017

4  
5 Sidsel Nag<sup>a,b,#</sup>, Johan Ursing<sup>c,d,e</sup>, Amabelia Rodrigues<sup>e</sup>, Marina Crespo<sup>a,b</sup>, Camilla Krogsgaard<sup>a,b</sup>,  
6 Ole Lund<sup>f</sup>, Frank M. Aarestrup<sup>g</sup>, Michael Alifrangis<sup>a,b</sup>, Poul-Erik Kofoed<sup>e,h,#</sup>.

7  
8 <sup>a</sup>: Centre for Medical Parasitology, Department of Immunology and Microbiology, University of  
9 Copenhagen, Denmark

10 <sup>b</sup>: Department of Infectious Diseases, Copenhagen University Hospital, Denmark.

11 <sup>c</sup>: Department of Clinical Sciences, Karolinska Institutet, Danderyds Hospital, Stockholm, Sweden.

12 <sup>d</sup>: Department of Infectious Diseases, Danderyds Hospital, Danderyd, Sweden

13 <sup>e</sup>: Bandim Health Project, Bissau, Guinea-Bissau

14 <sup>f</sup>: DTU Bioinformatics, Technical University of Denmark, Lyngby, Denmark

15 <sup>g</sup>: Division for Epidemiology and Microbial Genomics, National Food Institute, Technical  
16 University of Denmark, Kongens Lyngby, Denmark

17 <sup>h</sup>: Department of Paediatrics, Kolding Hospital, University of Southern Denmark, Kolding,  
18 Denmark.

19  
20 Running head: Antimalarial resistance in Bissau, Guinea-Bissau

21  
22 # Address correspondence to Sidsel Nag at: [jassd\\_nf@hotmail.com](mailto:jassd_nf@hotmail.com) and to Poul-Erik Kofoed at  
23 [poul.erik.kofoed@rsyd.dk](mailto:poul.erik.kofoed@rsyd.dk)

24 [Abstract](#) (word count: 232)

25 Real-time and large-scale surveillance of molecular markers of antimalarial drug resistance is a  
26 potential method of resistance monitoring, to complement therapeutic efficacy studies in settings  
27 where the latter are logistically challenging. This study investigates whether routinely used malaria  
28 rapid diagnostic tests (RDTs) can be used for massive parallel amplicon sequencing. RDTs used for  
29 malaria diagnosis were routinely collected together with patient age and sex between 2014 and  
30 2017, from two health centres in Bissau, Guinea-Bissau. A subset of positive RDTs (n=2,184) were  
31 tested for *Plasmodium* DNA content. Those containing sufficient *Plasmodium* DNA (n=1,390)  
32 were used for library preparation, consisting of amplification of gene fragments from *pfprt*, *pfmdr1*,  
33 *pfdhfr*, *pfdhps* and *pfK13*. A total of 5532 gene fragments were successfully analysed on a single  
34 Illumina Miseq flow cell. Pre-screening of samples for Plasmodium DNA content proved necessary  
35 and the nested PCR protocol applied for library preparation varied notably in PCR-positivity from  
36 13-87%. We found a high frequency of the *pfmdr1* codon 86N at 88%-97%, a significant decrease  
37 of the *pfprt* wildtype CVMNK haplotype and elevated levels of the *pfdhfr/pfdhps* quadruple mutant  
38 ranging from 33%-51% between 2014-2017. No polymorphisms indicating artemisinin tolerance  
39 were discovered. Lastly, the demographic data indicate a large proportion of young adults (66%,  
40 interquartile range 11-28 years) presenting with *P. falciparum* infections. With some caution, our  
41 findings suggest that routine collection of RDTs could facilitate large-scale molecular surveillance  
42 of antimalarial resistance.

43

44 [Importance](#) (word count: 147)

45 Continuous spread and repeated emergence of *Plasmodium falciparum* parasites resistant towards  
46 one or more antimalarials represents an enormous threat to current treatment efficacy levels,  
47 especially in sub-Saharan Africa, where 90% of malaria infections occur. In order to prevent

48 substantial treatment failure, it is therefore recommended to monitor treatment efficacy every 2-3  
49 years. Therapeutic efficacy studies, however, can present insurmountable logistical and financial  
50 challenges in some settings in sub-Saharan Africa. Molecular surveillance of antimalarial resistance  
51 is therefore an important proxy for treatment efficacy. However, the scale by which such studies  
52 can be performed depends on the development of high-throughput protocols and the accessibility of  
53 samples. If RDTs can be used in the high-throughput protocols available with Next Generation  
54 Sequencing (NGS)-technology, surveillance can be performed efficiently for any setting in which  
55 RDTs are already used for malaria diagnosis. The majority of settings in sub-Saharan Africa have  
56 access to RDTs.

57

58 Key words (3-10)

59 *Plasmodium falciparum*, Guinea-Bissau, molecular markers of antimalarial resistance, rapid  
60 diagnostic tests, next-generation sequencing, amplicon sequencing, *pfcr1*, *pfmdr1*, *pfdhfr*, *Pfdhps*,  
61 *pfk13*.

62

63

64 [Background](#) (word count (incl. conclusion): 3577)

65 In anticipation of novel emergence or geographic spread of especially artemisinin-resistant  
66 *Plasmodium falciparum* parasites (1-3), countries with malaria transmission are recommended to  
67 test the efficacy of their recommended artemisinin-based combination therapies (ACTs) every 2-3  
68 years (4). Therapeutic efficacy studies are often not feasible due to economic and practical  
69 constraints in many settings in Sub-Saharan Africa (SSA). It has been suggested that molecular  
70 surveillance of genetic polymorphisms associated with antimalarial resistance could complement  
71 therapeutic efficacy studies (4-15) because these can provide early warning signs of decreasing  
72 antimalarial efficacy (5). Molecular surveillance only requires sampling of *P. falciparum* infected  
73 blood, which in turn can be acquired from finger prick samples, as used for malaria rapid diagnostic  
74 tests (RDTs) (16, 17). RDTs are now routinely used for malaria diagnostics in in SSA, and  
75 molecular analysis on used RDTs may enable large-scale molecular surveillance of antimalarial  
76 resistance (18). Large-scale surveillance also requires highly efficient and cost-effective  
77 methodologies for the genetic analysis of the parasite DNA. Novel, high-throughput protocols  
78 based on next generation sequencing (NGS) technology have the potential to achieve this (19-21).

79

80 The primary aim of this study was to evaluate collected RDTs as source of parasite DNA for NGS-  
81 based molecular surveillance of antimalarial resistance. A modified version of a recently published  
82 NGS-based amplicon sequencing methodology was used (20). The molecular approach investigated  
83 SNPs and genes associated with tolerance/resistance towards the majority of currently available  
84 antimalarial treatments in a high-throughput manner, applying massive parallel sequencing and a  
85 custom-made sample-indexing approach. A secondary aim was to provide temporal molecular  
86 marker data from the setting in Bissau, Guinea-Bissau from samples obtained from May 2014 until  
87 April 2017, as well as a basic description of the demographic trends amongst malaria patients

88 versus non-malaria patients in the study area, by collecting minimal patient information together  
89 with the RDTs.

90

## 91 Results

92 Evaluation of the applicability of RDTs as source of DNA for NGS-based molecular surveillance

### 93 *PCR-corrected RDT positivity and negativity*

94 In total, 14,933 RDTs were used to diagnose patients at the two health centres between May 2014  
95 and April 2017, and collected. Out of these, 2,832 RDTs were positive. A flow chart depicting the  
96 sample screening and selection process is shown in Figure 1. All positive RDTs collected at the  
97 Bandim health centre (and not at the Belem health centre) which were received in Denmark  
98 (n=2,184, 77 % of the RDT positive samples) were subjected to DNA extraction. Samples that were  
99 successfully found logged in the RDT database (n=1,879, 86 % of the DNA-extracted samples)  
100 were then checked for PCR-positivity of the ribosomal 18S *Plasmodium* subunit. The overall PCR-  
101 corrected positivity amongst these samples was 74 % (n=1,390). Median age, sex-distribution and  
102 season of collection indicated no trends in the occurrence of false positive RDTs (data not shown).  
103 A total of 304 negative RDTs from the 2014 and 2015 transmission periods were also tested for  
104 PCR-positivity. Only 1 % of these (n=3) were found to be PCR-positive.

105

### 106 *PCR success-rate for single copy genes*

107 In total, 1,390 PCR corrected *Plasmodium* 18S-positive samples were used in nested PCRs  
108 designed to amplify the various gene fragments analysed in this study. The success-rate of single-  
109 copy gene PCRs varied from 13% to 87% (Figure 1). Specifically, the *pfdhfr* fragment was  
110 successfully amplified for 87 % of 18S-positive RDTs, while *pfert* and *pfmdr1* fragment 1 were  
111 amplified for 61 % and 56 %. The *pfmdr1* fragment 2, *pfdhps* as well as *pfK13* fragments 1-3 were

112 all amplified for 28-36 %, and lastly, *pfK13* fragments 4 and 5 were amplified for 13 % and 16 %,  
113 respectively. In total, 5532 gene fragments were successfully sequenced.

114 Molecular markers of antimalarial resistance

115 The observed frequencies of specific haplotypes are listed in Table 1 (mixed infections were  
116 omitted from haplotype analyses), while single SNP frequencies are listed in Table 2.

117

118 *SNPs in pfcr1 and pfmdr1*

119 The *pfcr1* c. 72-76 CVMNK wild type was found to decrease significantly through the years of  
120 sampling; from 45/67 (67 %) to 187/311 (60 %) and to 99/219 (45 %) samples in 2014, 2015 and  
121 2016, respectively (p=0.006, Fisher's exact test) (Table 1, Figure 3A). The *pfmdr1* c. 86+184 NF  
122 haplotype was found in 43/75 (57 %), 212/290 (73 %) and 116/187 (62 %) samples, while the NY  
123 haplotype was found in 22/75 (29 %), 68/290 (23 %) and 55/187 (29 %) samples (Table 1, Figure  
124 3B). SNP frequencies for *pfmdr1* c. 1034, 1042 and 1246 are listed in Table 2.

125

126 *SNPs in pfdhfr and pfdhps*

127 The *pfdhfr* c. 51 + 59 + 108 IRN triple mutant was found in 60/82 (73 %), 373/407 (92 %) and  
128 376/443 (85 %) samples in 2014, 2015 and 2016, respectively (p=0.001, Table 1, Figure 3C). The  
129 *pfdhps* c. 437G was found in 16/49 (33 %), 105/199 (53 %) and 109/185 (58 %) samples during  
130 2014, 2015 and 2016, respectively (mixed infections included). Accordingly, the quadruple  
131 *pfdhfr/pfdhps* mutant (*pfdhfr* IRN + *pfdhps* c. 437G) was found in 33 %, 49 % and 51 % of samples.  
132 SNP frequencies for *pfdhps* c. 436, 540, 581 and 613 are listed in Table 2.

133

134 SNPs identified in *pfk13*

135 As PCR-positivity for *Pfk13* fragments was very low, only data from the latest of the transmission  
136 periods is presented. A total of 311 samples collected during the 2016 transmission period were  
137 partially or completely sequenced in *pfk13*, whereof 97 were successfully sequenced in the  
138 propeller region. In total, 18 SNPs were identified in *pfk13*, only 3 of which were situated in the  
139 propeller region, 2 of which are non-synonymous (R529K and T535M) (Figure 4). In the N-  
140 terminal region, we identified 15 SNPs, 12 of which were non-synonymous (Figure 4). None of the  
141 identified SNPs occurred in more than two samples.

142

143 Demographic trends of RDT-positive versus RDT-negative patients

144 Sampling was carried out for 36 months, starting May 2014. Transmission periods were therefore  
145 defined as periods of 12 months going from May one year up to and including April the following  
146 year, which includes the high transmission period September to January. In order to compare years  
147 and transmission periods, transmission periods have been named according to the year when  
148 transmission started. The number of positive RDTs collected during the 2014, 2015 and 2016  
149 transmission periods were 497, 1374 and 961, respectively (Figure 5A). The number of positive  
150 RDTs collected during the 2014 transmission period was substantially lower than the numbers  
151 collected in the two later transmission periods. Unexpected “dips” in the number of RDT positive  
152 patients were seen during January and September 2016 (Figure 5A).

153 The median age of patients with a positive RDT was 19 years (interquartile range (IQR) 11-28)  
154 (Figure 5B). When divided into age groups of <5 years, 5-9, 10-14 and  $\geq 15$ , the number of patients  
155 with positive RDTs were 190 (6 %), 327 (12 %), 428 (15 %) (children less than 15 years of age  
156 combined = 945 (34 %)) and 1,847 (66 %) (Figure 5C, 40 samples did not have age stated). The sex

157 distribution amongst RDT positive patients was 1,145 males (52 %) and 1,647 females (48 %)  
158 (Figure 5D, 40 samples did not have sex stated).

159

160 The total number of negative RDTs collected was 12,101. The number of negative RDTs collected  
161 during the 2014, 2015 and 2016 transmission periods were 4,001, 4,362 and 3,738 (RDT negative  
162 database only includes until February 19<sup>th</sup> 2017), respectively. The median age of patients with a  
163 negative RDT was 18 years (IQR = 4-30) (Figure 5B). When divided into age groups of <5 years,  
164 5-9, 10-14 and  $\geq 15$ , the number of patients with a negative RDT was 3,154 (26 %), 1,503 (13 %),  
165 721 (6 %) and 6,638 (55 %) (Figure 5C, 85 samples did not have age stated). The sex distribution  
166 amongst RDT negative patients was 6,248 males (52 %) and 5,768 females (48 %) (Figure 5D, 85  
167 samples did not have sex stated).

168

169 In order to assess whether the proportion of adults was higher in the group of RDT positive patients  
170 than in the general population, proportions were compared to that of the general population of the  
171 country, estimated in 2015 as 41.7 % children below the age of 15 vs 58.3 % adults (32). The  
172 proportion of adults within the group of RDT-positive patients was found to be significantly higher  
173 than that within the general population (Pearsons chi-square,  $p = 0.05$ ), while the proportion of  
174 adults within the entire group of RDT-tested patients was not.

175

## 176 Discussion

177 The primary aim of this study was to evaluate whether used RDTs sampled from health centres in  
178 Bissau could be applied for molecular surveillance of antimalarial resistance using a recently  
179 developed NGS protocol (20). The secondary aim was to provide temporal molecular marker data  
180 from the setting in Bissau, Guinea-Bissau from samples obtained between May 2014 and April



181 2017 and as well explore basic demographic trends related to malaria epidemiology in Bissau, by  
182 collecting limited patient information together with the RDTs.

183

184 Proof of concept

185 Approximately 74 % of the positive RDTs were found PCR positive for the multicopy *Plasmodium*  
186 18S subunit, indicating firstly a diagnostic false positivity percentage of 26 %, and secondly that  
187 only a maximum of 74 % of the positive RDTs collected would contain *Plasmodium* DNA, which is  
188 required for molecular surveillance. While the reasons for the high false positivity rate of the RDTs  
189 analysed in this study remain unknown (other studies suggest remainder antigens, substituted RDT  
190 buffer and non-targeted infections (33, 34)), the results indicate that the cost-efficiency of using  
191 RDTs for molecular surveillance can be affected substantially by pre-screening the samples for the  
192 presence of *Plasmodium* DNA. Furthermore, the PCR-positivity of the single-copy genes involved  
193 in conferring resistance towards antimalarial drugs varied tremendously from 13%-87% after  
194 corrected 18S PCR-positivity. Studies using erythrocyte-enhanced samples (20) or dried venous  
195 blood spots (not erythrocyte-enhanced) on filter paper (C. Schmiegelow, H. S. Hansson, S. Nag and  
196 M. Alifrangis, unpublished) subjected to the same protocol resulted in PCR positivity of at least 90  
197 % for all fragments. Both the minute amount of parasite DNA available from an RDT, the DNA  
198 extraction protocol applied, as well as the state of the DNA in question (both at the time of  
199 extraction and at the time of running PCRs) may have contributed to the considerable variation in  
200 PCR positivity of single-copy genes. Preliminarily screening the DNA extracts for parasitaemia  
201 may give an indication of which samples can successfully produce resistance-data. While such an  
202 approach requires adding an extra qPCR step to the overall analysis, it would allow minimising  
203 reagent costs and time spent during downstream steps.

204

205 Overall, the analysis became more expensive per sample when using RDTs, than it would have  
206 been if samples had consisted of dried venous blood, not considering sampling costs. It was,  
207 however, still feasible to sequence 5532 gene fragments of approximately 500 bp, all with  
208 individual indices allowing trace-back to the sample of origin, on a single Miseq V3 flow cell with  
209 paired-end reads. Due to the possibility of simultaneously analysing a very large number of  
210 samples, the NGS protocol tested in this study has therefore proven highly affordable and also  
211 seems to remain efficient, compared to many other methods allowing trace-back to sample of  
212 origin, despite a very varied PCR-success for resistance-conferring genes. If the actual sampling  
213 costs are taken into consideration, the entire per sample cost still remains far cheaper than for dried  
214 venous blood samples, due to such samples requiring further sampling materials, labour and  
215 logistics.

216  
217 Other noteworthy limitations of the current study, when considering the concept of large-scale  
218 surveillance based on routine sampling of RDTs, include the fact that routine sampling of RDTs is  
219 completely dependent on RDT availability. In our study, RDTs may have been out of stock during  
220 January and September 2016, where unexplained “dips” in malaria frequency are seen for periods  
221 of time, in which case inclusion numbers for these months would be biased. Such bias can only be  
222 assessed if logs are kept by the clinics regarding their RDT availability, along with potential use of  
223 expired batches of RDTs (which was not the case in our setting). Furthermore, the nested PCR  
224 protocol which is required for the DNA extracted from RDTs, poses a much larger contamination  
225 risk during PCR procedures, than a simplex PCR protocol (35, 36). Finally, there are no sample  
226 backups when sampling RDTs, which may become a logistical and ethical concern.

227

228 *Molecular markers of antimalarial resistance*

229 The high prevalence of *pfmdr1* 86N in the current study, resembles previously published data for  
230 the same study area in 2010-2012 (approximately 80 %) (37), indicating a relatively stable  
231 prevalence. The data corresponds well with the use of AL and the AL-derived selection of the  
232 *pfmdr1* c. 86 N (10, 38, 39). Importantly however, a recently performed efficacy study indicates  
233 that the efficacy of AL is still 94-95 % (25), indicating that the prevalence of the *pfmdr1* c. 86 N at  
234 levels between 88-97 % is not affecting AL treatment efficacy in this setting. AL (lumefantrine  
235 specifically) has also been shown to select for the *pfprt* 76K wildtype (40). However, our study  
236 found a significant increase of the mutant *pfprt* CVIET haplotype over the study period. A similar  
237 trend has previously been observed in the same study area and QN usage was speculated to be the  
238 cause (37, 41). However, it may also be that the two observed events (2010-2012 and 2014-2016) of  
239 increasing levels of the CVIET haplotype represent “highs” in a more long-term fluctuation of this  
240 haplotype.

241

242 The levels of the *pfdhfr* IRN triple mutant found in this study (fluctuating between 73-92 %)   
243 indicate selection of this haplotype since earlier studies were conducted (in 2004; prevalence of 41  
244 %) (42). Likewise, the current levels of the *pfdhfr/pfdhps* quadruple mutant (33-51 %) indicate  
245 selection since previous studies were conducted (15 % quadruple mutant in 2004) (42). Large scale  
246 use of IPTp may have contributed to this selection, since IPTp is the only SP-based treatment that is  
247 still recommended and implemented in Guinea-Bissau (24), apart from a very recent deployment of  
248 seasonal malaria chemoprevention (SMC by use of SP+amodiaquine) in a northern region of the  
249 country (43). SP was never first-line treatment in Guinea-Bissau, but was recommended as second-  
250 line treatment from 1996-2007. Selection may also be caused by use of SP for self-treatment of  
251 malaria, the use of sulfamethoxazole-trimethoprim for bacterial infections, and finally it is also

252 possible that quadruple mutants are imported from neighbouring countries where SP has been used  
253 as first-line treatment and where mutant haplotypes have historically been more prevalent than in  
254 Guinea-Bissau (44-46).

255

256 Importantly, the current study revealed no SNPs of concern in *pfK13* (47). Combined with the  
257 previously published data regarding *pfK13* polymorphisms from the area (20), there are no signs of  
258 artemisinin selective pressure of the kind seen in South-East Asia and Suriname (3).

259

260 [Demographic trends](#)

261 The demographic data obtained from routinely collecting used RDTs, indicate that there was less  
262 malaria during the 2014 transmission period, than during 2015 and 2016 transmission periods.  
263 According to rainfall data obtained from Bandim for the three seasons, an increase in rainfall from  
264 2014 to 2015 was observed, which may have contributed to a rise in malaria cases (yearly rainfall  
265 was 941.2 mm in 2014, 1393 mm in 2015 and 983.9 mm in 2016) (48). A country-wide long-lasting  
266 insecticide treated bed net (LLIN) distribution campaign and subsequent follow-up study carried  
267 out in June and December 2014, confirmed the low prevalence in 2014 (1.3 % amongst children  
268 aged 0-59 months and 0.7 % amongst children 5-14 years) (49). Furthermore, according to the  
269 inclusion data from our study, adults (patients  $\geq 15$  years) represent the majority of infections during  
270 transmission periods, with a significantly larger proportion of adults amongst RDT positive  
271 patients, than amongst the entire RDT-tested population and the general population of the country  
272 (32). These findings correspond well with the trend of increasing median age of malaria patients  
273 previously described for the study area (22, 23).

274

## 275 Conclusion

276 This study provides proof of concept for the use of RDTs for molecular surveillance of antimalarial  
277 resistance through massively parallel amplicon sequencing with Illumina technology. Furthermore,  
278 the study provides evidence that there is a high frequency of the *pfmdr1* c. 86 N, that the *pfprt*  
279 CVIET haplotype has increased significantly over the course of the study, that the *pfdhfr/pfdhps*  
280 quadruple mutant has increased substantially in frequency since 2004, and that there are no  
281 accumulating SNPs in *pfK13* as of May 2017 in Bissau, Guinea-Bissau. Lastly, the study provides  
282 evidence as to how routine sampling of used RDTs combined with minimal patient data, can  
283 provide insight regarding basic demographic trends amongst the malaria patients.

284

## 285 Methods

### 286 Study site

287 The current study was carried out in the capital of Guinea-Bissau. Malaria epidemiology in Guinea-  
288 Bissau has changed during the past decades and is now highly seasonal with epidemics occurring  
289 from September, peaking in November and lasting through January (22, 23). Children aged <5  
290 years no longer account for the majority of malaria cases as the median age is gradually increasing  
291 (23). The 1<sup>st</sup>-line treatment for malaria is artemether-lumefantrine (AL) (24), which was recently  
292 shown to be effective in the Bissau area (25). Quinine (QN) is the 2<sup>nd</sup>- and 3<sup>rd</sup>-line treatment for  
293 malaria (24) and intermittent preventive treatment in pregnancy (IPTp) is implemented (24).

294

### 295 RDT sampling

296 Positive and negative RDTs were collected from patients of all ages whom health workers  
297 suspected might be infected with *P. falciparum* (typically associated with presence of a fever within

298 the last 24 hours), presenting at the Bandim or Belem health centres from May 2014 until April  
299 2017. Patient age, sex and date of collection were written on the RDT and on a clinical records  
300 form. All information was put into a folder on a daily basis, and subsequently entered into an  
301 electronic database. RDTs were collected in a storage box containing silica gel, which was kept  
302 dark at room temperature, and stored between 3 and 9 months before shipment to Denmark, where  
303 they were stored between 0 and 9 months at room temperature before DNA extraction was  
304 performed.

305

#### 306 DNA extraction

307 DNA was extracted by the chelex method, as described previously (26), in a 96-well format with no  
308 samples in lane 12 and 4 blanks dispersed between lanes 1 and 11.

309

#### 310 PCR-corrected RDT positivity and negativity

311 A PCR amplifying the multicopy ribosomal 18S subunit of all *Plasmodium* species was performed  
312 on all positive RDTs received in Denmark, as well as on 304 negative RDTs from the high  
313 transmission seasons of 2014 and 2015. The PCR protocol has been described previously (27, 28).

314

#### 315 Genetic analysis

316 Molecular markers of antimalarial resistance were assessed by NGS-based amplicon sequencing,  
317 using a modified version of a previously published protocol (20). In brief, amplicons (amplified  
318 gene-fragments) from the infecting parasites, depicted in Figure 2, were produced by PCR and  
319 prepared for massively parallel sequencing on the Illumina Miseq sequencer through a previously  
320 published PCR-based library-preparation method (20) (based on Illumina's own protocol for 16S  
321 metagenomics sequencing (29)). All amplicons pertaining to the same infection were barcoded with

322 the same unique set of custom-made indices in the 5' and 3' ends. All barcoded amplicons were  
323 pooled prior to sequencing and sequenced in parallel. De-multiplexing of sequence data was  
324 performed based on all of the unique index-combinations given to the samples during library  
325 preparation. The original multiplex, non-nested amplification of gene-fragments were modified to  
326 simplex, nested amplification of the same or slightly modified gene-fragments (Figure 2) due to the  
327 minute amount of DNA contained in RDT extracts (20). As all PCRs were performed in simplex,  
328 certain fragments were redesigned to accommodate all of the genetic positions of interest within a  
329 single fragment (to reduce the number of PCRs), instead of two fragments (regarding *pfdhps* and 3'-  
330 *pfmdr1*). In these cases, certain areas of the fragments are not sequenced, as the paired-end 300 bp  
331 sequencing is not long enough to sequence the entire fragment. All primers are listed in  
332 supplementary Table 1.

333

#### 334 *Controls and duplicates*

335 The majority of samples were run once, with 10 % of samples run as duplicates. Control samples  
336 used in the study consisted of DNA from well characterised parasites, namely 3D7, FCR3, DD2,  
337 K1, 7G8, MRA-1238 and MRA-1239 (12), the latter two of which are *pfK13* controls. Other  
338 controls consisted of patient samples from earlier studies, where the haplotypes within specific  
339 genes are known, namely AA (*pfdhps* 436A+437A), AG (*pfdhps* 436A+437G), 540E (*pfdhps* 540E)  
340 and 164L (*pfdhfr* 164L). An entire overview of control sample haplotypes is listed in supplementary  
341 Table 2.

342

#### 343 *Library preparation*

344 PCRs were performed as described previously (20), with the following alterations: all fragments  
345 were amplified individually, and as nested PCRs. The outer and the nested PCR programs were

346 identical to the previously published “gene-specific PCR”, except that they consisted of 40 cycles  
347 each. The nested PCR was performed with primers containing the overhangs, as was previously the  
348 case for the “gene-specific PCR”. The nested PCR products were pooled according to sample of  
349 origin, prior to index PCR, as described previously. The index PCR was run according to the  
350 original protocol (20). All primers and corresponding fragments are listed in supplementary Table  
351 1, and depicted in Figure 2. Fragments included in the study cover *pfprt* codon (c) c. 31-138, *pfmdr1*  
352 c. 60-237 and c. 1022-1260 (where c. 1123-1160 are not sequenced), *pfdhfr* c. 12-174, *pfdhps* c.  
353 392-622 (where c. 492-522 are not sequenced) as well as *pfK13* c. 17-709.

354  
355 Amplicon purification, dilution, pooling and sequencing were all performed as previously  
356 described, at the DTU Multi Assay Core (DMAC), Technical University of Denmark (20).

357

#### 358 *Quality trimming and base calling*

359 Data analysis of raw sequencing reads was performed using *cutadapt* (30) and *assimpler* (31), as  
360 described previously (20). All primer sequences were trimmed from the raw data prior to SNP  
361 analysis.

362

#### 363 *Mixed infections*

364 Infections were defined as mixed if more than one base was called for a given position in a given  
365 sample, and was supported by at least 25 % of the base calls for that position for the sample in  
366 question.



367

368 [Statistics](#)

369 Pearson's chi-square was used to assess whether there was a difference in the proportions of  
370 children and adults amongst RDT-positive patients as compared to the general population. Fisher's  
371 exact test was used to assess whether there was a significant trend over time in the frequencies of  
372 the detected haplotypes. Mixed infections were counted in all groups for single SNP-prevalence and  
373 omitted for haplotypes.

374

375

376 [Ethical approval](#)

377 Ethical approval for conducting the study and sampling used RDTs was acquired from the ethical  
378 review board in Bissau (ref: 022/CNES/INASA/2014, dated September 17th 2014).

379

380 [Funding](#)

381 This work was supported by Mærsk Foundation (bilagnr. OMPC1400002999), Else og Mogens  
382 Wedell-Wedellborgs Fond (J. Nr. 13-15-1) and Carl og Ellen Hertz' Legat til Dansk Læge- og  
383 Naturvidenskab (løbenr. 6.14.2 and løbenr. 13.17.2)

384

385 [Acknowledgements](#)

386 The authors would like to express great gratitude to the health workers at the Bandim and Belem  
387 health centres for collecting samples and typing patient data into the electronic database.  
388 Furthermore, the authors would like to acknowledge everybody who has travelled with extra  
389 suitcases full of RDTs from Guinea-Bissau to Denmark, as well as Ulla Abildtrup and Kenneth

390 Kauffmann Slot for laboratory support, DMAC (DTU) and Marlene Danner Dalgaard for NGS  
391 expertise and performance and finally Frederik Shaltz-Buchholzer and Mikael Bay von Scholten for  
392 database support.

393

394 [Conflict of interest](#)

395 The authors declare no conflicts of interest.

396 REFERENCES

- 397 1. Muller IB, Hyde JE. Antimalarial drugs: modes of action and mechanisms of parasite  
398 resistance. *Future Microbiol.* 2010;5(12):1857-73.
- 399 2. Sibley CH. Understanding drug resistance in malaria parasites: basic science for public  
400 health. *Mol Biochem Parasitol.* 2014;195(2):107-14.
- 401 3. World Health Organization. Status Report on Artemisinin Resistance. 2014.
- 402 4. World Health Organization. Methods for surveillance of antimalarial drug efficacy. 2009.
- 403 5. Christian Nsanzabana et al. Meeting of experts on antimalarial drug resistance using  
404 molecular markers. 2018.
- 405 6. Fidock DA, Nomura T, Talley AK, Cooper RA, Dzekunov SM, Ferdig MT, et al. Mutations  
406 in the *P. falciparum* digestive vacuole transmembrane protein PfCRT and evidence for their role in  
407 chloroquine resistance. *Mol Cell.* 2000;6(4):861-71.
- 408 7. Cowman AF, Morry MJ, Biggs BA, Cross GA, Foote SJ. Amino acid changes linked to  
409 pyrimethamine resistance in the dihydrofolate reductase-thymidylate synthase gene of *Plasmodium*  
410 *falciparum*. *Proceedings of the National Academy of Sciences of the United States of America.*  
411 1988;85(23):9109-13.
- 412 8. Triglia T, Menting JG, Wilson C, Cowman AF. Mutations in dihydropteroate synthase are  
413 responsible for sulfone and sulfonamide resistance in *Plasmodium falciparum*. *Proceedings of the*  
414 *National Academy of Sciences of the United States of America.* 1997;94(25):13944-9.
- 415 9. Price RN, Uhlemann AC, Brockman A, McGready R, Ashley E, Phaipun L, et al.  
416 Mefloquine resistance in *Plasmodium falciparum* and increased *pfmdr1* gene copy number. *Lancet.*  
417 2004;364(9432):438-47.
- 418 10. Sisowath C, Ferreira PE, Bustamante LY, Dahlstrom S, Martensson A, Bjorkman A, et al.  
419 The role of *pfmdr1* in *Plasmodium falciparum* tolerance to artemether-lumefantrine in Africa. *Trop*  
420 *Med Int Health.* 2007;12(6):736-42.
- 421 11. Veiga MI, Dhingra SK, Henrich PP, Straimer J, Gnadig N, Uhlemann AC, et al. Globally  
422 prevalent PfMDR1 mutations modulate *Plasmodium falciparum* susceptibility to artemisinin-based  
423 combination therapies. *Nature communications.* 2016;7:11553.
- 424 12. Ariey F, Witkowski B, Amaratunga C, Beghain J, Langlois AC, Khim N, et al. A molecular  
425 marker of artemisinin-resistant *Plasmodium falciparum* malaria. *Nature.* 2014;505(7481):50-5.
- 426 13. Amato R, Lim P, Miotto O, Amaratunga C, Dek D, Pearson RD, et al. Genetic markers  
427 associated with dihydroartemisinin-piperaquine failure in *Plasmodium falciparum* malaria in  
428 Cambodia: a genotype-phenotype association study. *Lancet Infect Dis.* 2017;17(2):164-73.
- 429 14. Witkowski B, Duru V, Khim N, Ross LS, Saintpierre B, Beghain J, et al. A surrogate  
430 marker of piperaquine-resistant *Plasmodium falciparum* malaria: a phenotype-genotype association  
431 study. *Lancet Infect Dis.* 2017;17(2):174-83.
- 432 15. Christian Nsanzabana et al. Target product profile for a molecular assay for antimalarial  
433 drug resistance surveillance. 2018.
- 434 16. Ishengoma DS, Lwitiho S, Madebe RA, Nyagonde N, Persson O, Vestergaard LS, et al.  
435 Using rapid diagnostic tests as source of malaria parasite DNA for molecular analyses in the era of  
436 declining malaria prevalence. *Malaria journal.* 2011;10:6.
- 437 17. Morris U, Aydin-Schmidt B, Shakely D, Martensson A, Jornhagen L, Ali AS, et al. Rapid  
438 diagnostic tests for molecular surveillance of *Plasmodium falciparum* malaria -assessment of DNA  
439 extraction methods and field applicability. *Malaria journal.* 2013;12:106.
- 440 18. Ndiaye M, Sow D, Nag S, Sylla K, Tine RC, Ndiaye JL, et al. Country-Wide Surveillance of  
441 Molecular Markers of Antimalarial Drug Resistance in Senegal by Use of Positive Malaria Rapid  
442 Diagnostic Tests. *Am J Trop Med Hyg.* 2017;97(5):1593-6.

- 443 19. Daniels R, Ndiaye D, Wall M, McKinney J, Sene PD, Sabeti PC, et al. Rapid, field-  
444 deployable method for genotyping and discovery of single-nucleotide polymorphisms associated  
445 with drug resistance in *Plasmodium falciparum*. *Antimicrob Agents Chemother*. 2012;56(6):2976-  
446 86.
- 447 20. Nag S, Dalgaard MD, Kofoed PE, Ursing J, Crespo M, Andersen LO, et al. High-throughput  
448 resistance profiling of *Plasmodium falciparum* infections based on custom dual indexing and  
449 Illumina next generation sequencing-technology. *Scientific reports*. 2017;7(1):2398.
- 450 21. Levitt B, Obala A, Langdon S, Corcoran D, O'Meara WP, Taylor SM. Overlap Extension  
451 Barcoding for the Next Generation Sequencing and Genotyping of *Plasmodium falciparum* in  
452 Individual Patients in Western Kenya. *Scientific reports*. 2017;7:41108.
- 453 22. Rodrigues A, Schellenberg JA, Kofoed PE, Aaby P, Greenwood B. Changing pattern of  
454 malaria in Bissau, Guinea Bissau. *Trop Med Int Health*. 2008;13(3):410-7.
- 455 23. Ursing J, Rombo L, Rodrigues A, Aaby P, Kofoed PE. Malaria transmission in Bissau,  
456 Guinea-Bissau between 1995 and 2012: malaria resurgence did not negatively affect mortality. *PloS*  
457 *one*. 2014;9(7):e101167.
- 458 24. World Health Organization. World Malaria Report 2016. Geneva: World Health  
459 Organization; 2017. Report No.: 978-92-4-151171-1 Contract No.: August 14th.
- 460 25. Ursing J, Rombo L, Rodrigues A, Kofoed PE. Artemether-Lumefantrine versus  
461 Dihydroartemisinin-Piperaquine for Treatment of Uncomplicated *Plasmodium falciparum* Malaria  
462 in Children Aged Less than 15 Years in Guinea-Bissau - An Open-Label Non-Inferiority  
463 Randomised Clinical Trial. *PloS one*. 2016;11(9):e0161495.
- 464 26. Schriefer ME, Sacci JB, Jr., Wirtz RA, Azad AF. Detection of polymerase chain reaction-  
465 amplified malarial DNA in infected blood and individual mosquitoes. *Exp Parasitol*.  
466 1991;73(3):311-6.
- 467 27. Snounou G, Viriyakosol S, Jarra W, Thaithong S, Brown KN. Identification of the four  
468 human malaria parasite species in field samples by the polymerase chain reaction and detection of a  
469 high prevalence of mixed infections. *Mol Biochem Parasitol*. 1993;58(2):283-92.
- 470 28. Toure M, Petersen PT, Bathily SN, Sanogo D, Wang CW, Schioler KL, et al. Molecular  
471 Evidence of Malaria and Zoonotic Diseases Among Rapid Diagnostic Test-Negative Febrile  
472 Patients in Low-Transmission Season, Mali. *Am J Trop Med Hyg*. 2017;96(2):335-7.
- 473 29. Illumina. 16S Metagenomic Sequencing Library Preparation - Preparing 16S Ribosomal  
474 RNA Gene Amplicons for the Illumina MiSeq System 2013 [Available from:  
475 [http://www.illumina.com/content/dam/illumina-](http://www.illumina.com/content/dam/illumina-support/documents/documentation/chemistry_documentation/16s/16s-metagenomic-library-prep-guide-15044223-b.pdf)  
476 [support/documents/documentation/chemistry\\_documentation/16s/16s-metagenomic-library-prep-](http://www.illumina.com/content/dam/illumina-support/documents/documentation/chemistry_documentation/16s/16s-metagenomic-library-prep-guide-15044223-b.pdf)  
477 [guide-15044223-b.pdf](http://www.illumina.com/content/dam/illumina-support/documents/documentation/chemistry_documentation/16s/16s-metagenomic-library-prep-guide-15044223-b.pdf).
- 478 30. Martin M. Cutadapt Removes Adapter Sequences From High-Throughput Sequencing  
479 Reads. *EMBnetjournal*. 2011;17(1):10-2.
- 480 31. Leekitcharoenphon P, Nielsen EM, Kaas RS, Lund O, Aarestrup FM. Evaluation of whole  
481 genome sequencing for outbreak detection of *Salmonella enterica*. *PloS one*. 2014;9(2):e87991.
- 482 32. Department of Economics and Social Affairs UN. World Population Prospects The 2017  
483 Revision. 2018.
- 484 33. Mouatcho JC, Goldring JP. Malaria rapid diagnostic tests: challenges and prospects. *J Med*  
485 *Microbiol*. 2013;62(Pt 10):1491-505.
- 486 34. Gillet P, Mori M, Van den Ende J, Jacobs J. Buffer substitution in malaria rapid diagnostic  
487 tests causes false-positive results. *Malaria journal*. 2010;9:215.
- 488 35. Murray DC, Coghlan ML, Bunce M. From benchtop to desktop: important considerations  
489 when designing amplicon sequencing workflows. *PloS one*. 2015;10(4):e0124671.

- 490 36. Seitz V, Schaper S, Droge A, Lenze D, Hummel M, Hennig S. A new method to prevent  
491 carry-over contaminations in two-step PCR NGS library preparations. *Nucleic acids research*.  
492 2015;43(20):e135.
- 493 37. Jovel IT, Kofoed PE, Rombo L, Rodrigues A, Ursing J. Temporal and seasonal changes of  
494 genetic polymorphisms associated with altered drug susceptibility to chloroquine, lumefantrine, and  
495 quinine in Guinea-Bissau between 2003 and 2012. *Antimicrob Agents Chemother*. 2015;59(2):872-  
496 9.
- 497 38. Malmberg M, Ferreira PE, Tarning J, Ursing J, Ngasala B, Bjorkman A, et al. Plasmodium  
498 falciparum drug resistance phenotype as assessed by patient antimalarial drug levels and its  
499 association with pfmdr1 polymorphisms. *The Journal of infectious diseases*. 2013;207(5):842-7.
- 500 39. Thomsen TT, Madsen LB, Hansson HH, Tomas EV, Charlwood D, Bygbjerg IC, et al.  
501 Rapid selection of Plasmodium falciparum chloroquine resistance transporter gene and multidrug  
502 resistance gene-1 haplotypes associated with past chloroquine and present artemether-lumefantrine  
503 use in Inhambane District, southern Mozambique. *Am J Trop Med Hyg*. 2013;88(3):536-41.
- 504 40. Sisowath C, Petersen I, Veiga MI, Martensson A, Premji Z, Bjorkman A, et al. In vivo  
505 selection of Plasmodium falciparum parasites carrying the chloroquine-susceptible pfert K76 allele  
506 after treatment with artemether-lumefantrine in Africa. *The Journal of infectious diseases*.  
507 2009;199(5):750-7.
- 508 41. Ursing J, Kofoed PE, Rodrigues A, Rombo L. No seasonal accumulation of resistant P.  
509 falciparum when high-dose chloroquine is used. *PloS one*. 2009;4(8):e6866.
- 510 42. Kofoed PE, Alfrangis M, Poulsen A, Rodrigues A, Gjedde SB, Ronn A, et al. Genetic  
511 markers of resistance to pyrimethamine and sulfonamides in Plasmodium falciparum parasites  
512 compared with the resistance patterns in isolates of Escherichia coli from the same children in  
513 Guinea-Bissau. *Trop Med Int Health*. 2004;9(1):171-7.
- 514 43. Médecins sans frontières. Guinea-Bissau: Many children would be saved if they arrived  
515 earlier 2016 [Available from: [http://www.msf.org/en/article/guinea-bissau-%E2%80%9Cmany-  
516 children-would-be-saved-if-they-arrived-hospital-earlier%E2%80%9D](http://www.msf.org/en/article/guinea-bissau-%E2%80%9Cmany-children-would-be-saved-if-they-arrived-hospital-earlier%E2%80%9D)].
- 517 44. Papa Mze N, Ndiaye YD, Diedhiou CK, Rahamatou S, Dieye B, Daniels RF, et al. RDTs as  
518 a source of DNA to study Plasmodium falciparum drug resistance in isolates from Senegal and the  
519 Comoros Islands. *Malaria journal*. 2015;14:373.
- 520 45. Ndiaye YD, Diedhiou CK, Bei AK, Dieye B, Mbaye A, Mze NP, et al. High resolution  
521 melting: a useful field-deployable method to measure dhfr and dhps drug resistance in both highly  
522 and lowly endemic Plasmodium populations. *Malaria journal*. 2017;16(1):153.
- 523 46. Nwakanma DC, Duffy CW, Amambua-Ngwa A, Oriero EC, Bojang KA, Pinder M, et al.  
524 Changes in malaria parasite drug resistance in an endemic population over a 25-year period with  
525 resulting genomic evidence of selection. *The Journal of infectious diseases*. 2014;209(7):1126-35.
- 526 47. Menard D, Khim N, Beghain J, Adegnikaa AA, Shafiul-Alam M, Amodu O, et al. A  
527 Worldwide Map of Plasmodium falciparum K13-Propeller Polymorphisms. *N Engl J Med*.  
528 2016;374(25):2453-64.
- 529 48. World Weather Online. Weather in Bandim, Guinea-Bissau 2018 [Available from:  
530 <https://www.worldweatheronline.com/lang/en-au/bandim-weather-averages/bissau/gw.aspx>].
- 531 49. The National Institute of Public Health Guinea-Bissau. Evaluation of the long lasting  
532 insecticide treated net distribution campaign impact in Guinea-Bissau. 2015.

## 533 Figure legends

### 534 Figure 1 Sample screening and processing

535 Samples were collected from all patients tested with an RDT, and subsets of positive and negative  
536 samples were used for DNA extraction and subsequent analyses. \* Almost all samples from Belem  
537 were lost due to faulty extraction procedures, and other samples logged in the database were never  
538 identified amongst the RDTs received. # A number of positive RDTs received in Denmark, were  
539 not found in the database (no RDT with corresponding number or information had been logged).  
540 DNA extraction was performed before cross-referencing samples with the electronic database  
541 because the electronic database was not ready when samples were received, and postponing DNA-  
542 extraction was avoided.

543

### 544 Figure 2 Amplicons incorporated in the sequencing library preparation

545 Fragments from *pfprt*, *pfmdr1*, *pfdhfr*, *pfdhps* and *pfK13* were incorporated in the sequencing  
546 library. Grey circles indicate SNP positions of interest, and the numbering corresponds to codons.  
547 Grey lines indicate areas of amplicons that are not sequenced.

548

### 549 Figure 3 Molecular markers of antimalarial resistance 2014-2017

550 A) Frequency of *pfprt* c. 72-76 haplotypes CVMNK and CVIET found each consecutive  
551 transmission season. B) Frequency of *pfmdr1* c.86 + 184 haplotypes NF, NY, YF and YY found  
552 each consecutive year. C) Frequency of *pfdhfr* c. 51 + 59 + 108 haplotypes IRN, NCS and “other”  
553 (consisting of NCN, ICN and NRN) found each consecutive year. The single mutant NCN  
554 represented 6/8 “other” *pfdhfr* haplotypes during the 2014 transmission season, while the two  
555 double mutants ICN and NRN combined accounted for 15/16 and 49/50 of “other” *pfdhfr*

556 haplotypes found during the 2015 and 2016 transmission seasons, respectively D) Frequency of  
557 *pfdhps* c. 436 + 437 + 540 + 581 + 613 haplotypes AAKAA, AGKAA, SAKAA and SGKAA found  
558 each consecutive year.

559

560 [Figure 4 \*pfK13\* polymorphisms observed 2016-2017](#)

561 Polymorphisms detected in *pfK13* during the transmission season from September 2016-January  
562 2017. The grey bar indicates the N-terminal part of the translated K13 protein, while the coloured  
563 bars (yellow, blue, brown, peach, green and purple) indicate blades 1-6 in the propeller region. Grey  
564 circles indicate a synonymous SNP, while black circles indicate a non-synonymous SNP. Positions  
565 refer to amino-acid positions in the translated protein. The R529K and T535M mutations were each  
566 found only once.

567

568 [Figure 5 Description of RDT positive and negative patients included in the study](#)

569 A) Number of positive RDTs collected at the two health centres combined every month, for the  
570 three consecutive years of sampling, going from May to April. The malaria transmission season  
571 goes from September through January. B) Median age and IQR of RDT positive and RDT negative  
572 patients included throughout the study. C) Age distribution of RDT positive and RDT negative  
573 patients into groups consisting of <5 years, 5-9 years, 10-14 years and  $\geq 15$  years. D) Sex  
574 distribution of RDT positive and RDT negative patients throughout the study.

575

576

577

578

579

580 Tables

581 *Table 1* Frequencies of haplotypes found during the transmission periods 2014-2016 (May 2014-  
 582 April 2017), *p*-values are from Fisher's exact test for trend over time. Mixed infections were omitted  
 583 from haplotype analysis.

| Frequencies of haplotypes                                      |                               |              |               |               |                 |
|----------------------------------------------------------------|-------------------------------|--------------|---------------|---------------|-----------------|
| gene                                                           | haplotype                     | 2014         | 2015          | 2016          | p-value (trend) |
| 18S success                                                    |                               | 76 % (n=228) | 80 % (n=676)  | 66 % (n=486)  |                 |
| <i>pfprt</i><br>c. 72 – 76                                     | CVMNK<br>(wildtype)           | 67% (45/67)  | 60% (187/311) | 45% (99/219)  | 0.006           |
|                                                                | CVIET<br>(mutant)             | 33% (22/67)  | 40% (124/311) | 55% (120/219) | 0.006           |
| <i>pfmdr1</i><br>c. 86 + 184                                   | NF                            | 57% (43/75)  | 73% (212/290) | 62% (116/187) | 0.052           |
|                                                                | NY                            | 29% (22/75)  | 23% (68/290)  | 29% (55/187)  | 0.052           |
|                                                                | YF                            | 11% (8/75)   | 3% (9/290)    | 9% (16/187)   | 0.084           |
|                                                                | YY                            | 3% (2/75)    | 0% (1/290)    | 0% (0/187)    | 0.109           |
| <i>pfdhfr</i><br>c. 51 + 59 + 108                              | NCS<br>(wildtype)             | 17% (14/82)  | 4% (18/407)   | 4% (17/443)   | 0.001           |
|                                                                | IRN<br>(triple mutant)        | 73% (60/82)  | 92% (373/407) | 85% (376/443) | 0.001           |
| <i>pfdhps</i><br>c. 436 + 437 + 540<br>+ 581 + 613             | AAKAA<br>(wildtype)           | 25% (17/68)  | 25% (23/93)   | 23% (39/170)  | 0.956           |
|                                                                | AGKAA<br>(mutant)             | 15% (10/68)  | 6% (6/93)     | 11% (19/170)  | 0.439           |
|                                                                | SAKAA<br>(wildtype)           | 26% (18/68)  | 29% (27/93)   | 21% (36/170)  | 0.083           |
|                                                                | SGKAA<br>(mutant )            | 34% (23/68)  | 38% (35/93)   | 43% (73/170)  | 0.448           |
| <i>pfdhfr</i><br>c. 51 + 59 + 108 +<br><i>pfdhps</i><br>c. 437 | IRN + G<br>(quadruple mutant) | 33% (16/49)  | 49% (97/199)  | 51% (94/185)  | 0.072           |

584

585

586

587

588



589 Table 2 SNP prevalence, mixed infections counted in both groups

| Gene          | codon | amino acid | 2014       |       | 2015       |       | 2016       |       |
|---------------|-------|------------|------------|-------|------------|-------|------------|-------|
|               |       |            | percentage | count | percentage | count | percentage | count |
| 18S           |       |            |            | 228   |            | 676   |            | 486   |
| <i>pfprt</i>  | 74    | M          | 74%        | 64    | 67%        | 267   | 48%        | 120   |
|               |       | I          | 43%        | 37    | 53%        | 209   | 61%        | 152   |
|               | 75    | N          | 74%        | 64    | 67%        | 267   | 48%        | 120   |
|               |       | E          | 43%        | 37    | 53%        | 209   | 61%        | 152   |
|               | 76    | K          | 74%        | 64    | 68%        | 271   | 48%        | 120   |
|               |       | T          | 43%        | 37    | 53%        | 210   | 61%        | 152   |
| <i>pfmdr1</i> | 86    | N          | 88%        | 70    | 97%        | 351   | 92%        | 202   |
|               |       | Y          | 14%        | 11    | 4%         | 13    | 13%        | 29    |
|               | 184   | F          | 70%        | 56    | 81%        | 315   | 74%        | 163   |
|               |       | Y          | 34%        | 27    | 42%        | 163   | 38%        | 84    |
|               | 1034  | S          | 100%       | 67    | 100%       | 182   | 100%       | 202   |
|               |       | C          | 0%         | 0     | 0%         | 0     | 0%         | 0     |
|               | 1042  | N          | 100%       | 67    | 100%       | 182   | 100%       | 202   |
|               |       | D          | 0%         | 0     | 0%         | 0     | 0%         | 0     |
|               | 1246  | D          | 96%        | 64    | 100%       | 182   | 100%       | 201   |
|               |       | Y          | 4%         | 3     | 0%         | 0     | 0%         | 1     |
| <i>pfdhfr</i> | 51    | N          | 28%        | 24    | 9%         | 40    | 16%        | 80    |
|               |       | I          | 76%        | 65    | 94%        | 408   | 92%        | 471   |
|               | 59    | C          | 29%        | 25    | 11%        | 47    | 19%        | 96    |
|               |       | R          | 76%        | 65    | 93%        | 403   | 91%        | 466   |
|               | 108   | S          | 20%        | 17    | 7%         | 35    | 7%         | 40    |
|               |       | N          | 84%        | 73    | 96%        | 449   | 97%        | 526   |
|               | 164   | I          | 100%       | 86    | 100%       | 432   | 100%       | 513   |
|               |       | L          | 0%         | 0     | 0%         | 0     | 0%         | 0     |
| <i>pfdhps</i> | 436   | S          | 73%        | 36    | 77%        | 157   | 68%        | 127   |
|               |       | A          | 31%        | 15    | 30%        | 62    | 36%        | 67    |
|               | 437   | A          | 67%        | 33    | 57%        | 114   | 47%        | 88    |
|               |       | G          | 33%        | 16    | 53%        | 107   | 58%        | 109   |
|               | 540   | K          | 98%        | 52    | 99%        | 134   | 99%        | 186   |
|               |       | E          | 2%         | 1     | 1%         | 2     | 1%         | 2     |
|               | 581   | A          | 100%       | 53    | 100%       | 136   | 100%       | 185   |
|               |       | G          | 0%         | 0     | 0%         | 0     | 0%         | 0     |
|               | 613   | A          | 100%       | 52    | 98%        | 129   | 99%        | 187   |
|               |       | S/T        | 0%         | 0     | 2%         | 2     | 1%         | 1     |

590 *Supplementary Table 1 Primers and fragments amplified*

| gene          | fragment (genomic)            | fragment (codons) | outer fw primer                   | outer reverse primer               | nested fw primer                                                                       | nested reverse primer                                                                        |
|---------------|-------------------------------|-------------------|-----------------------------------|------------------------------------|----------------------------------------------------------------------------------------|----------------------------------------------------------------------------------------------|
| <i>pfprt</i>  | 270-772                       | 31-138            | crt.48.70.OF                      | crt.805.826.OR                     | crt.270.296.FiO                                                                        | crt.750.772.RiO                                                                              |
|               |                               |                   | TGACGAGCGTTATAGAGA<br>ATTAG       | GATTGGATATTTCCAGTAGT<br>TC         | <b>TCGTCGGCAGCGTCAGATGTGTATAAG</b><br><b>AGACAGT</b> GGCTCACGTTTAGGTGGAGG<br>TTCTTG    | <b>GTCTCGTGGGCTCGGAGATGT</b><br><b>GTATAAGAGACAGCAGGCATC</b><br>TAACATGGATATAGC              |
| <i>pfmdr1</i> | fragment 1<br>- 179-711       | 60-237            | mdr1.1.1.25.OF                    | mdr1.942.961.OR                    | mdr1.179.208.FiO                                                                       | mdr1.682.711.RiO                                                                             |
|               |                               |                   | ATGGGTAAAGAGCAGAA<br>AGAGAA       | ATGGATATAACTGAGGCACC<br>ATTA       | <b>TCGTCGGCAGCGTCAGATGTGTATAAG</b><br><b>AGACAGC</b> ATTTGTATGTGCTGTATTATCA<br>GGAGGAA | <b>GTCTCGTGGGCTCGGAGATGT</b><br><b>GTATAAGAGACAGAGCCTCTTC</b><br>TATAATGGACATGGTATTGTT       |
|               | fragment 2<br>- 3067-<br>3780 | 1022-1260         | mdr1.2908.2935.OF                 | mdr1.3892.3921.OR                  | mdr1.3067.3094.FiO                                                                     | mdr1.3754.3780.RiO                                                                           |
|               |                               |                   | TTGCATTTAGTTCAGATG<br>ATGAAATG    | TGGTCCAACATTTGTATCATA<br>TTTATTTGG | <b>TCGTCGGCAGCGTCAGATGTGTATAAG</b><br><b>AGACAG</b> AGAATTATTGTAATGCAGCTT<br>TATGGG    | <b>GTCTCGTGGGCTCGGAGATGT</b><br><b>GTATAAGAGACAGT</b> AACATGG<br>GTTCTTGACTAACTATTGA         |
| <i>pfdhfr</i> | 35-523                        | 12-174            | dhfr.1.29.OF                      | dhfr.630.659.OR                    | dhfr.35.62.FiO                                                                         | dhfr.493.523.RiO                                                                             |
|               |                               |                   | ATGATGGAACAAGTCTGC<br>GACGTTTTCGA | GTTGTATTGTTACTAGTATAT<br>ACATCGCTA | <b>TCGTCGGCAGCGTCAGATGTGTATAAG</b><br><b>AGACAG</b> ATGCCATATGTGCATGTTGTAA<br>GGTTGA   | <b>GTCTCGTGGGCTCGGAGATGT</b><br><b>GTATAAGAGACAGCT</b> AAAAAT<br>TCTTGATAAACAACGGAACCTC<br>C |
| <i>pfdhps</i> | 1177-1868                     | 392-622           | dhps.1061.1089.OF                 | dhps.1916.1944.OR                  | dhps.1177.1203.FiO                                                                     | dhps.1843.1868.RiO                                                                           |
|               |                               |                   | ACAAATATGTGAGTAGGA<br>TGAAAGAACAA | CATCCAATTGTGTGATTTGTC<br>CACAATAT  | <b>TCGTCGGCAGCGTCAGATGTGTATAAG</b><br><b>AGACAG</b> GGAAATTTAAATGTTAATTATG<br>ATTCT    | <b>GTCTCGTGGGCTCGGAGATGT</b><br><b>GTATAAGAGACAG</b> ATTACAAC<br>ATTTTGATCATTATGCA           |

|              |                        |         |                                                        |                                                   |                                                                                                        |                                                                                                        |
|--------------|------------------------|---------|--------------------------------------------------------|---------------------------------------------------|--------------------------------------------------------------------------------------------------------|--------------------------------------------------------------------------------------------------------|
| <i>pfk13</i> | fragment 1 - 50-498    | 17-166  | K13.1.29.OF<br>ATGGAAGGAGAAAA<br>GTAAAAACAAAAGC        | K13.1023.1047.O.R<br>TCTTCATCAAATCGTTTCCTATGTT    | K13.50.76.FiO<br><b>TCGTCGGCAGCGTCAGATGTGT<br/>ATAAGAGACAGCTATGACGTAT<br/>GATAGGGAATCTGGTG</b>         | K13.471.498.FiO<br><b>GTCTCGTGGGCTCGGAGATGTGT<br/>ATAAGAGACAGGTTGGTATTCATA<br/>ATTGATGGAGAATTC</b>     |
|              | fragment 2 - 427-914   | 143-304 | same as <i>pfk13</i> fragment 1                        | same as <i>pfk13</i> fragment 1                   | K13.427.455.FiO<br><b>TCGTCGGCAGCGTCAGATGTGT<br/>ATAAGAGACAGCTGACAGCAA<br/>ATAATATAACTAATAATCT</b>     | K13.890.914.RiO<br><b>GTCTCGTGGGCTCGGAGATGTGT<br/>ATAAGAGACAGTCTTCATCAAATC<br/>GTTTCCTATGTT</b>        |
|              | fragment 3 - 803-1207  | 267-402 | K13.764.794.O.F<br>GAGTACGATTGTACAA<br>AGAATTAGAAAACCG | K13.2145.2167.OR<br>GCTATTAACGGAGTGACCAAATCT<br>G | K13.803.831.FiO<br><b>TCGTCGGCAGCGTCAGATGTGT<br/>ATAAGAGACAGTTGAAGAACA<br/>GAAATTACATGATGAAAGA</b>     | K13.1178.1207.RiO<br><b>GTCTCGTGGGCTCGGAGATGTGT<br/>ATAAGAGACAGATAACTCACTATC<br/>CCTATCTAAGAATATTC</b> |
|              | fragment 4 - 1139-1669 | 380-556 | same as <i>pfk13</i> fragment 3                        | same as <i>pfk13</i> fragment 3                   | K13.1139.1166.FiO<br><b>TCGTCGGCAGCGTCAGATGTGT<br/>ATAAGAGACAGTAAGTGGGAAAG<br/>ACATCATGTAACCAAGAGA</b> | K13.1642.1669.RiO<br><b>GTCTCGTGGGCTCGGAGATGTGT<br/>ATAAGAGACAGCTTCTACATTCGG<br/>TATAATAGAAGAGCC</b>   |
|              | fragment 5 - 1637-2127 | 546-709 | same as <i>pfk13</i> fragment 3                        | same as <i>pfk13</i> fragment 3                   | K13.1637.1663.FiO<br><b>TCGTCGGCAGCGTCAGATGTGT<br/>ATAAGAGACAGATGATGGCTC<br/>TTCTATTATACCGAATG</b>     | K13.2100.2127.RiO<br><b>GTCTCGTGGGCTCGGAGATGTGT<br/>ATAAGAGACAGCCAAGCTGCCATT<br/>CATTGTATCTGGT</b>     |

593

594

595 *Supplementary Table 2 Control sample data*

|         | <i>pfcr1</i> | <i>pfmdr1</i>                | <i>pfdhfr</i>       | <i>pfdhps</i>              |
|---------|--------------|------------------------------|---------------------|----------------------------|
|         | c. 72-76     | c. 86, 184, 1034, 1042, 1246 | c. 51, 59, 108, 164 | c. 436, 437, 540, 581, 613 |
| AA      | CVMNK        | NYSND                        | NRNI                | AAKAA                      |
| 164L    | CVIET        | YYSND                        | IRNL                | SGKAT                      |
| 540E    | -----        | NYSND                        | IRNI                | AAKAA                      |
| AG      | CVMNK        | N/YFSND                      | NRNI                | AGKGS                      |
| mra1239 | CVIET        | NYSND                        | IRNL                | SGEAS                      |
| mra1238 | CVIET        | NYSND                        | IRNI                | AGEAA                      |
| 7g8     | SVMNT        | NFCDY                        | ICNI                | SGKAA                      |
| k1      | CVIET        | YYSND                        | NRNI                | SGKGA                      |
| dd2     | CVIET        | YYSND                        | IRNI                | SGKAS                      |
| fcr3    | CVINT        | YYSND                        | NCTI                | SAKAA                      |
| 3d7     | CVMNK        | NYSND                        | NCSI                | SGKAA                      |

596

Figure 1. Sample screening, processing and PCR positivity

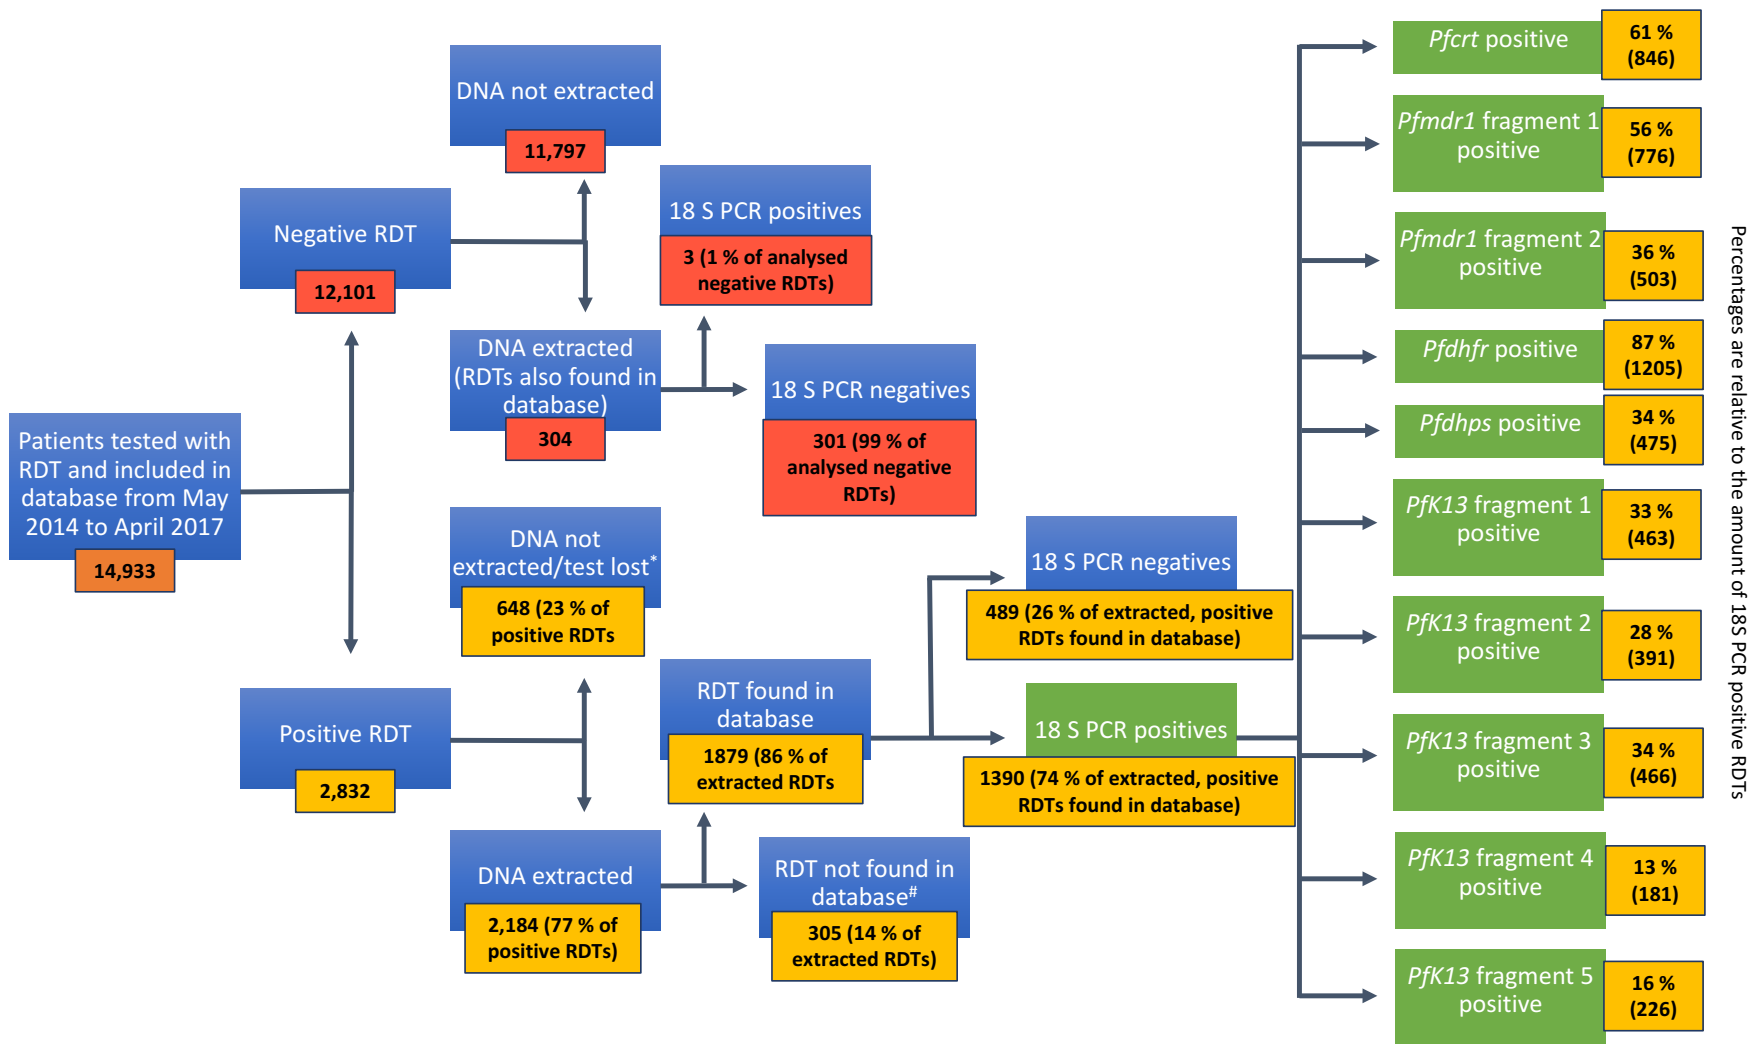

Percentages are relative to the amount of 18S PCR positive RDTs

Figure 2. Amplicons incorporated in the sequencing library preparation

PF3D7\_0417200 | bifunctional dihydrofolate reductase-thymidilate synthase (DHFR-TS) | CDS length = 1827

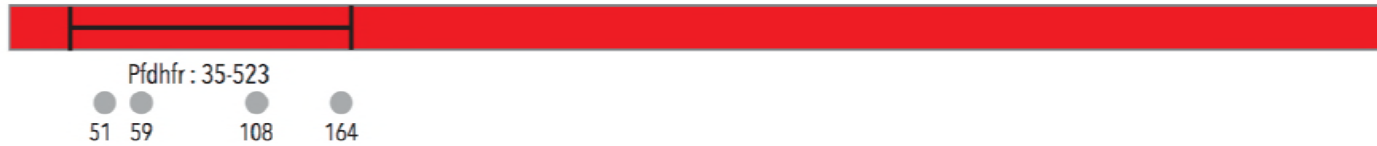

PF3D7\_0523000 | multidrug resistance protein (MDR1) | CDS length = 4260

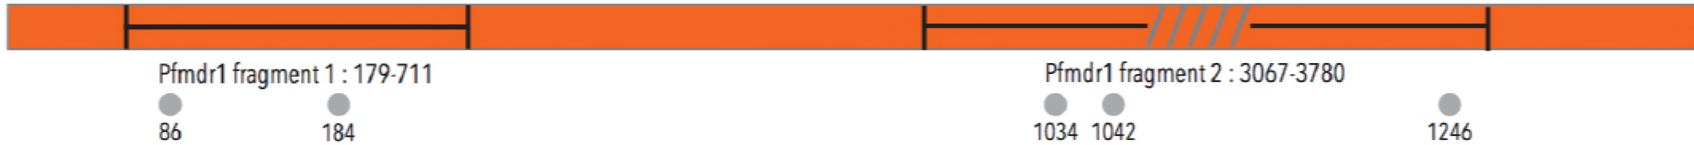

PF3D7\_070900 | chloroquine resistance transporter (CRT) | CDS length = 1275

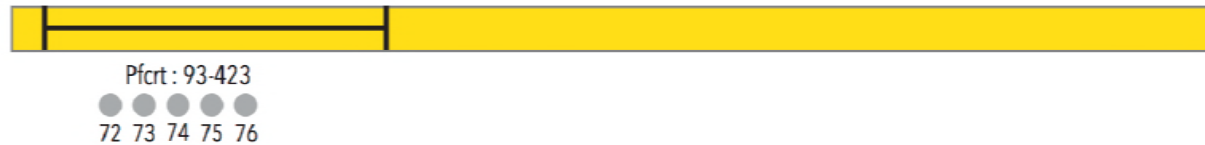

PF3D7\_0810800 | hydroxymethylidihydropterin pyrophosphokinase-dihydropteroate synthase (PPPK-DHPS) | CDS length = 2121

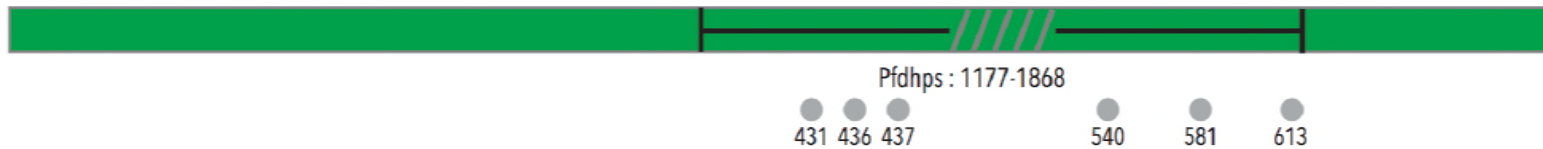

PF3D7\_1343700 | kelch protein, putative (K13) | CDS length = 2181

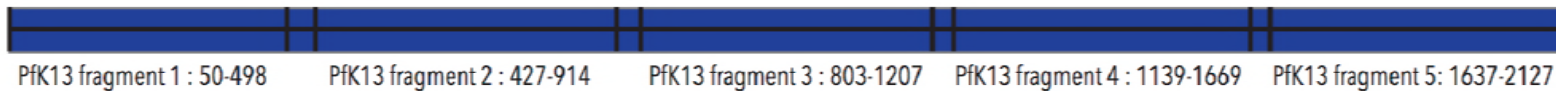

**Figure 3: Molecular markers of antimalarial resistance 2014-2017**

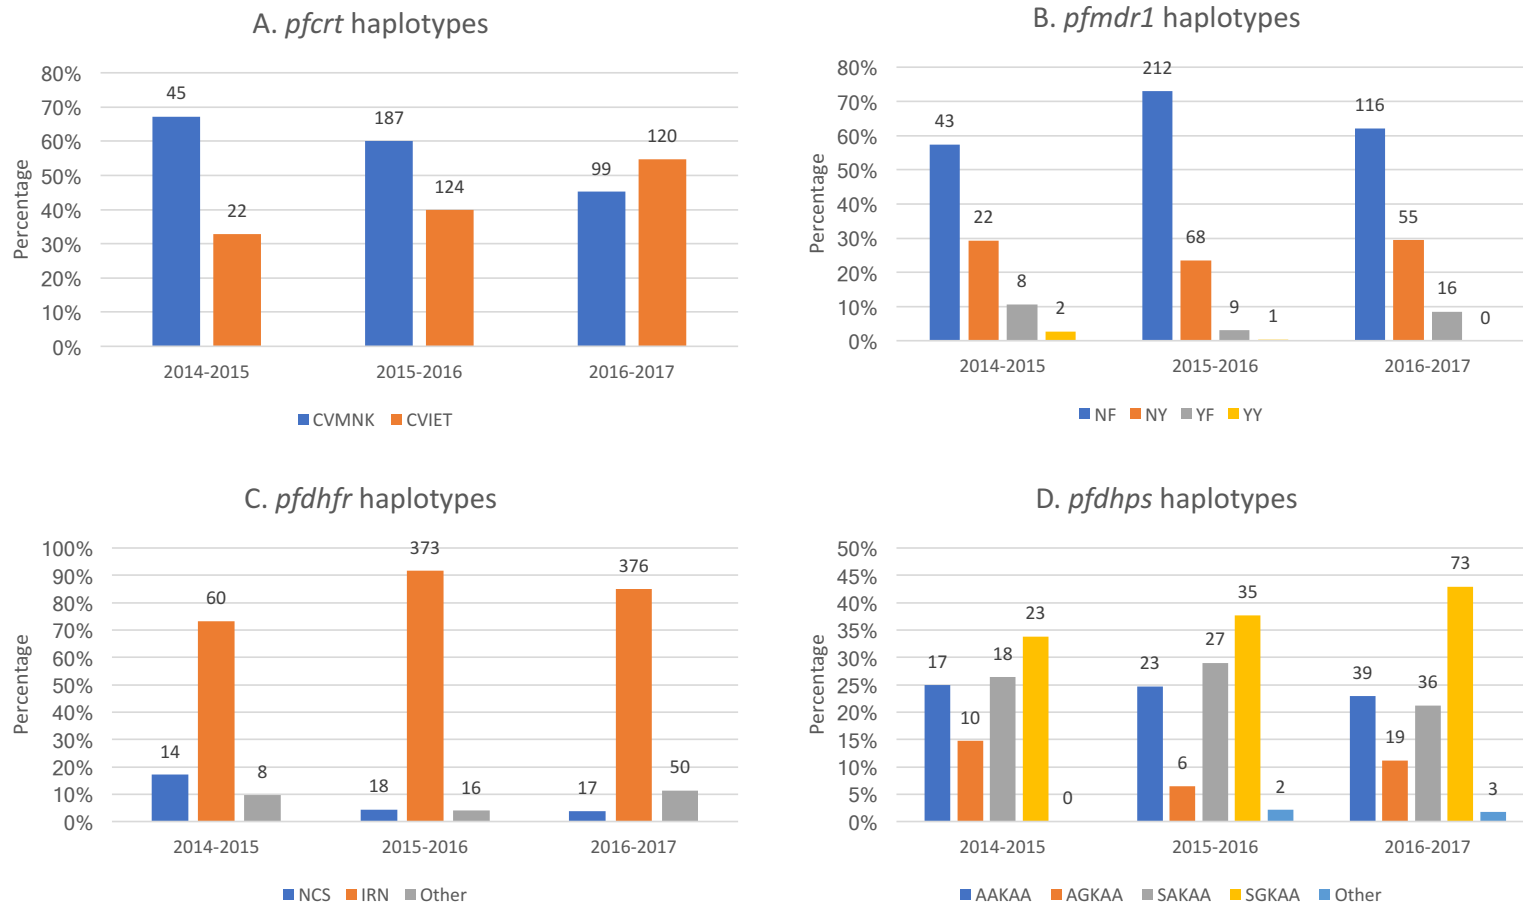

**Figure 4: PfK13 polymorphisms observed 2016-2017.**

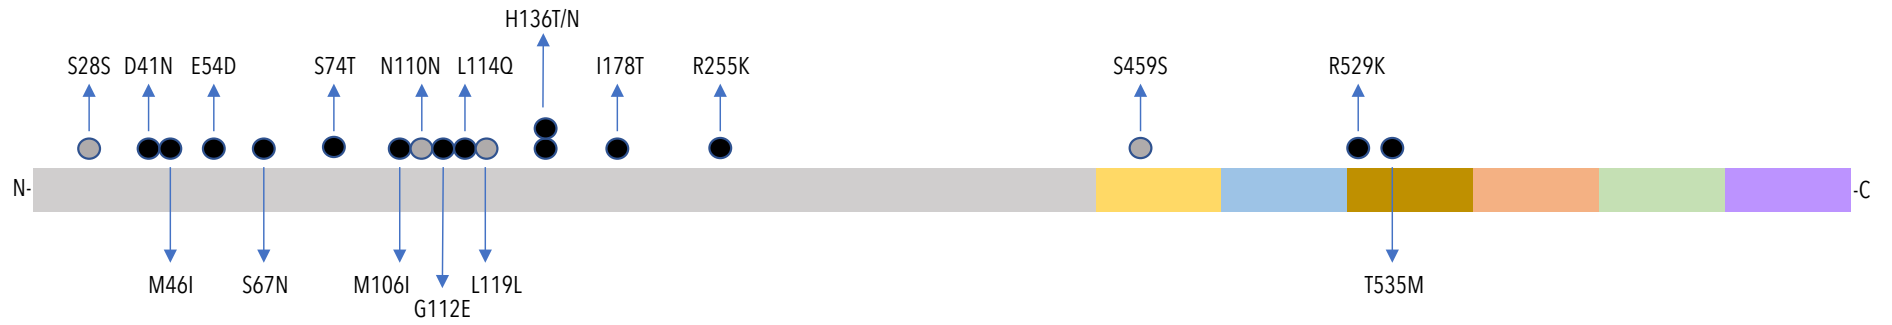



**Figure 5: Description of RDT positive and negative patients included in the study**

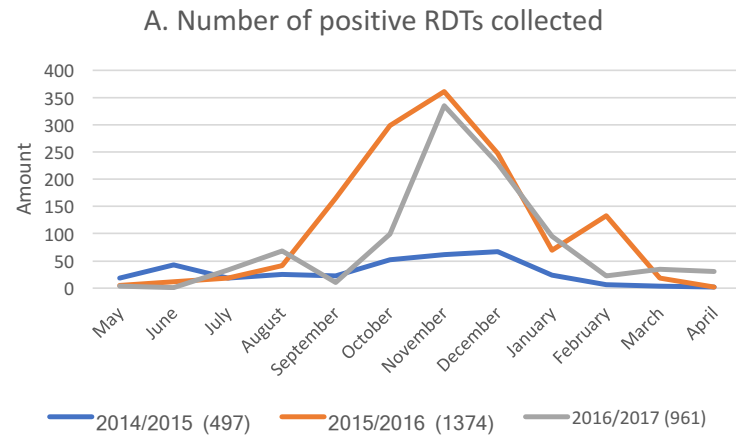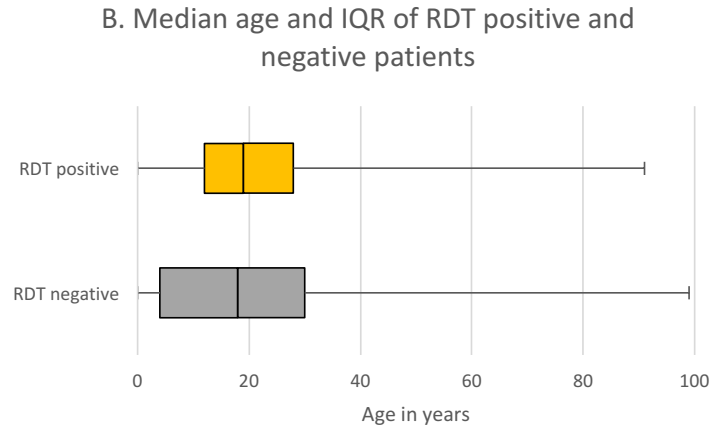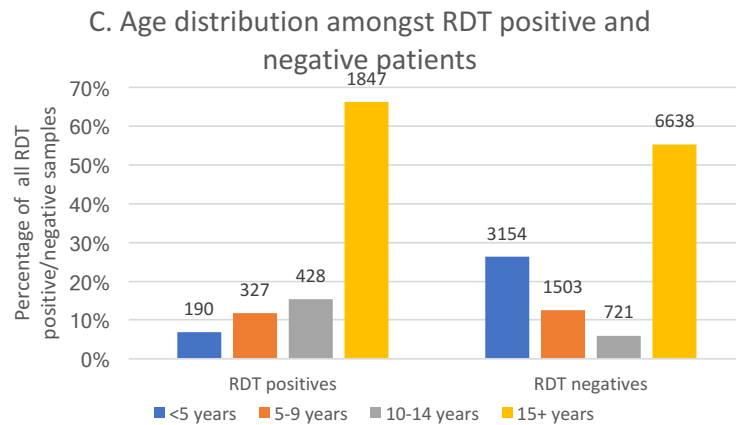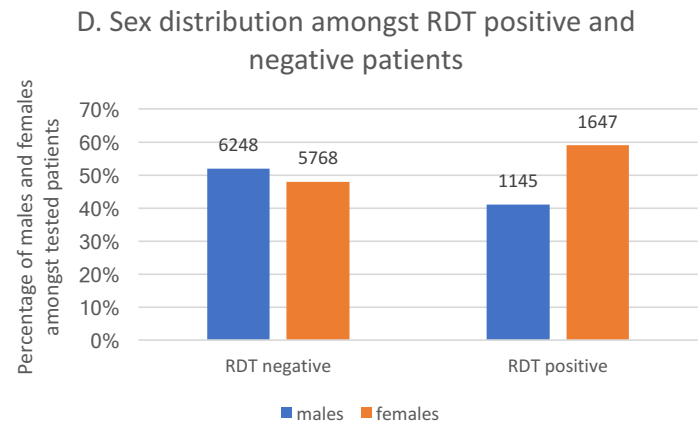

Source: http://biorxiv.org/content/10.1101/481390v1.full.pdf
